# Supplementary material
Source: PubMed Central journal article supplement (PMC3578183)
Supplement: NIHMS432547-supplement-1.pdf [file NIHMS432547-supplement-1.pdf]

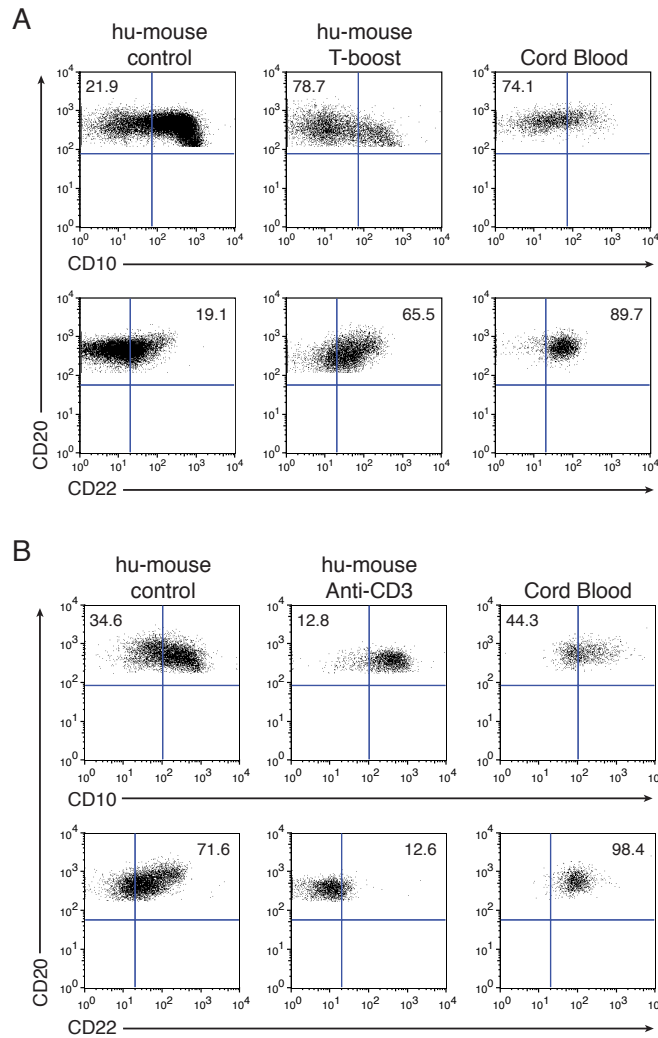

Figure S1. FACS analysis of B cells in spleens of mice injected with or depleted of T cells.

(A) Expression of CD10 (top) and CD22 (bottom) on hCD45+CD20+ gated B cells from CB (right panels) or spleens of control hu-mice (left panels) or hu-mice injected with autologous CB cells ("T-boost", middle panels) at 11-12 wks of age. Mice were euthanized and spleen cells analyzed by FACS at 14-15 wks of age. Data are representative of 8 mice per group and >25 CB samples.

(B) Same as panel A with the exception that the middle panels represent cells from T cell-depleted hu-mice ("Anti-CD3"). These hu-mice received anti-CD3 Ab injections twice weekly from 9 wks of age to time of euthanasia at 18-24 wks. Data are representative of 6-8 mice per group and >25 CB samples.
